# Supplementary material for: Outcomes of Treatment for Hepatitis C Virus Infection by Primary Care Providers
Source: Atypon-hosted journal article supplement (doi:10.1056/nejmoa1009370), 2011-06-01
Supplement: nejmoa1009370_appendix.pdf [file nejmoa1009370_appendix.pdf]

## Supplementary Appendix

This appendix has been provided by the authors to give readers additional information about their work.

Supplement to: Arora S, Thornton K, Murata G, et al. Outcomes of treatment for hepatitis C virus infection by primary care providers. *N Engl J Med* 2011;364:2199-207. DOI: 10.1056/NEJMoa1009370.

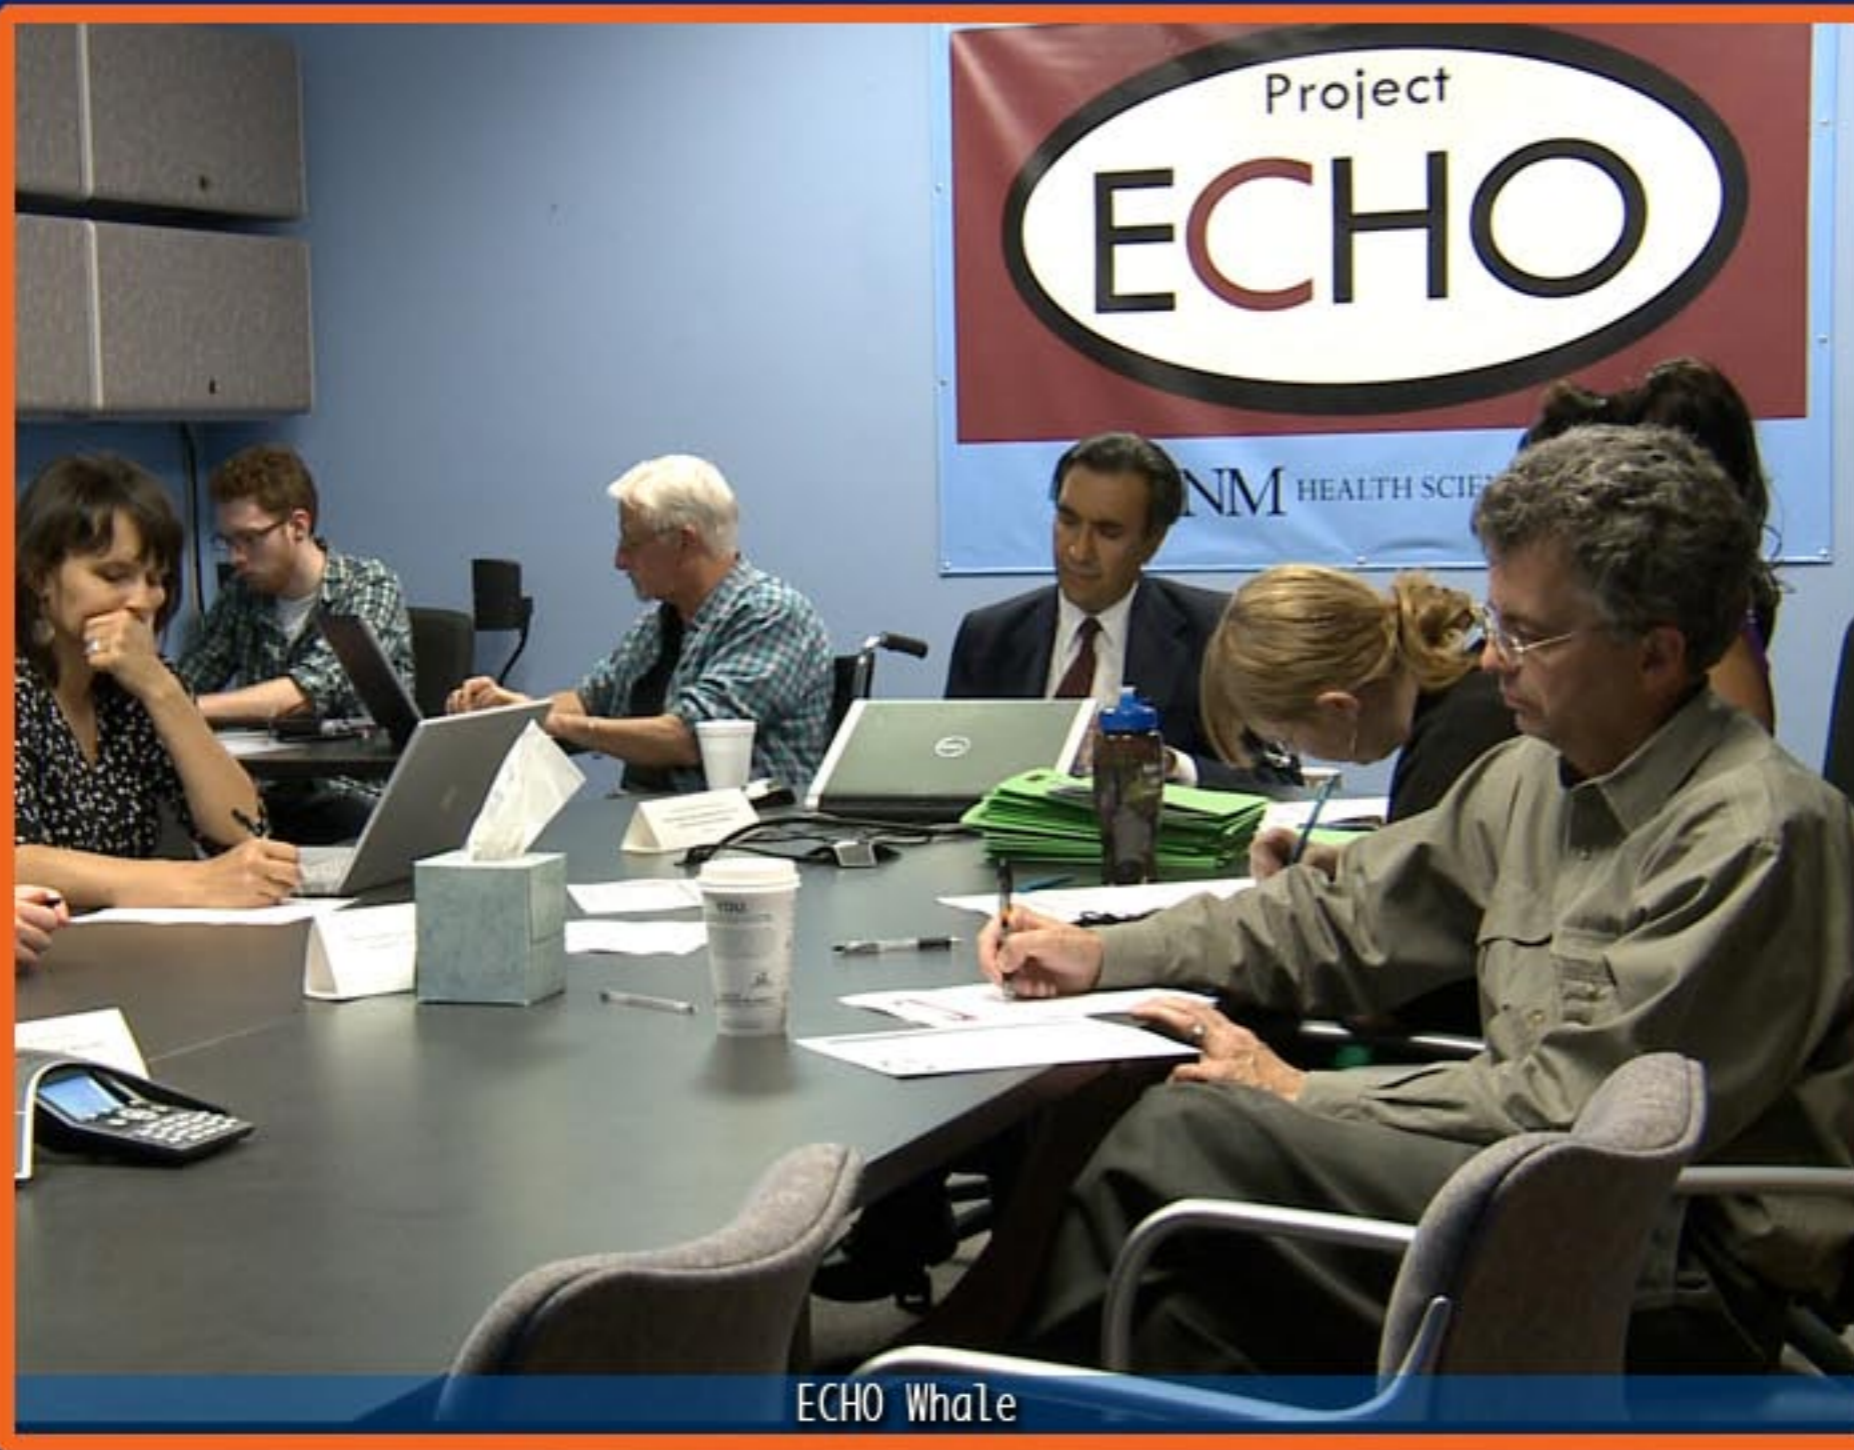

ECHO Whale

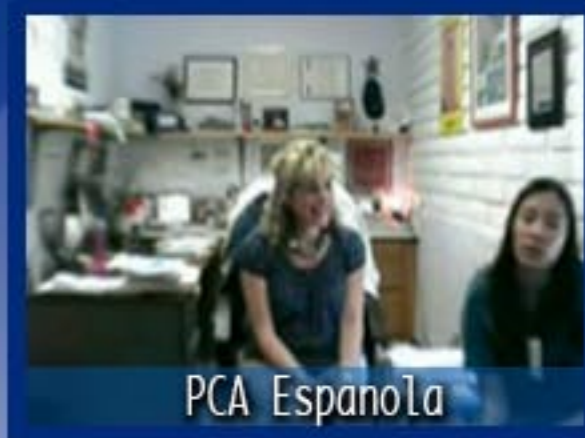

PCA Española

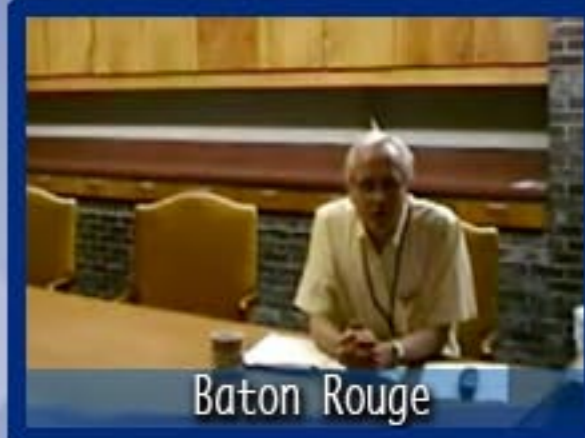

Baton Rouge

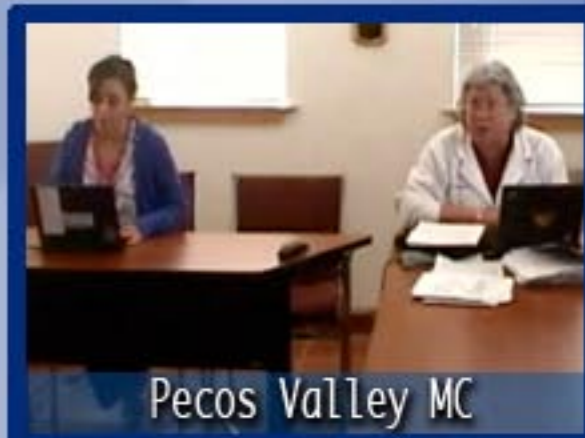

Pecos Valley MC

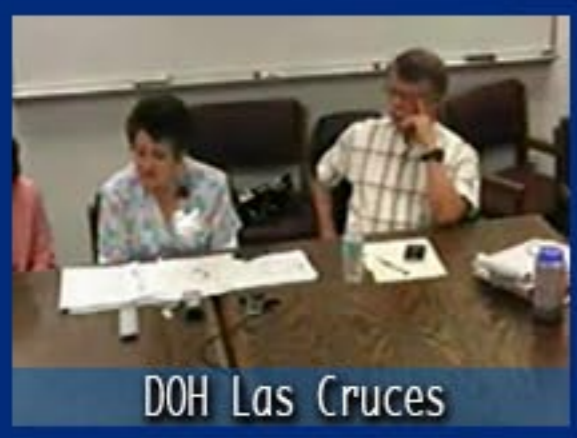

DOH Las Cruces

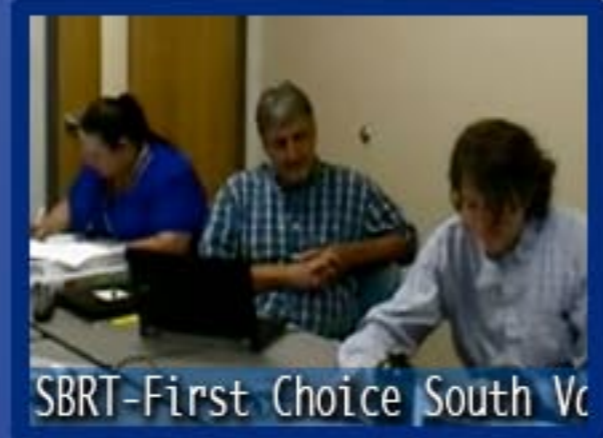

SBRT-First Choice South Va

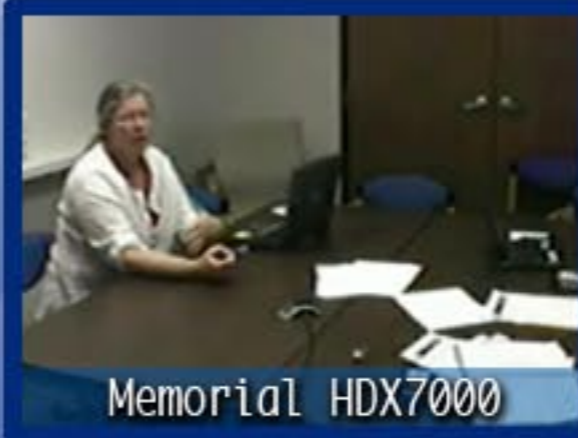

Memorial HDX7000

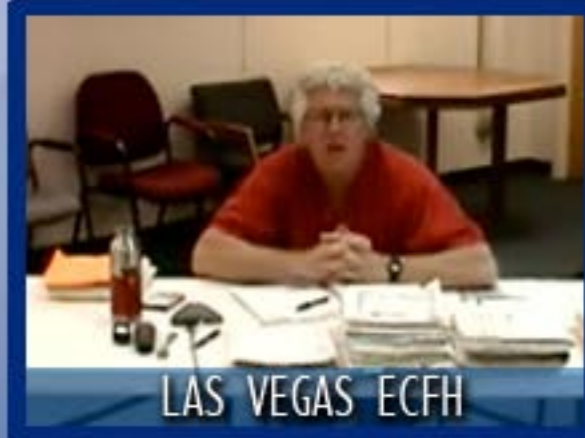

LAS VEGAS ECFH
